# Supplementary material for: Open-air oxidative Heck reactions at room temperature
Source: Royal Society of Chemistry journal article supplement (doi:10.1039/b517152k), 2006-01-01

## **Supplementary information**

### **Open-air oxidative Heck reactions at room temperature**

Per-Anders Enquist, Jonas Lindh, Peter Nilsson, and Mats Larhed\*

Organic Pharmaceutical Chemistry, Department of Medicinal Chemistry, Uppsala University,  
BMC, Box-574, SE-751 23 Uppsala, Sweden.

mats@orgfarm.uu.se

Containing:  $^{13}\text{C}$  NMR and GC-MS chromatograms of compounds **6** and **8**

**2-((*E*)-2-*p*-tolylvinyl)-[1,3]-dioxolane (6)**

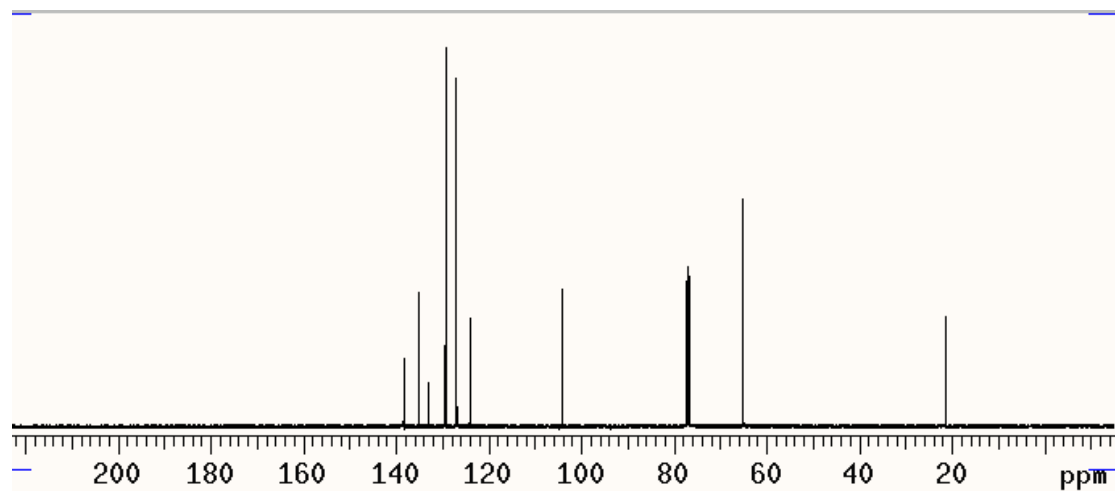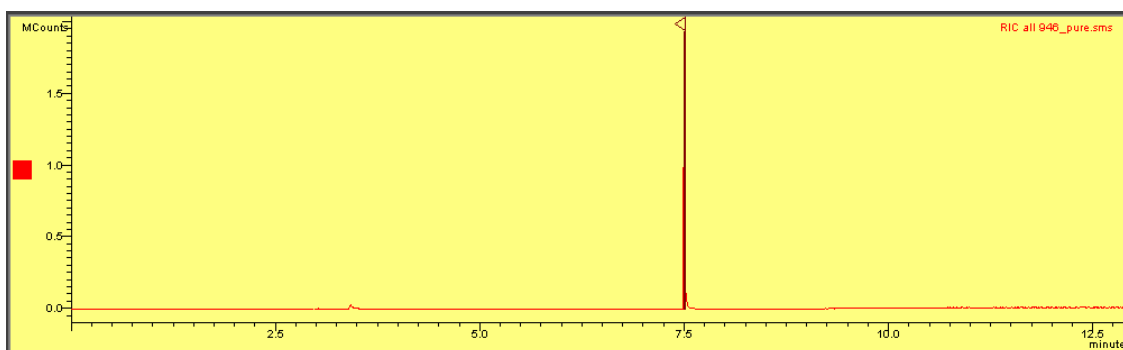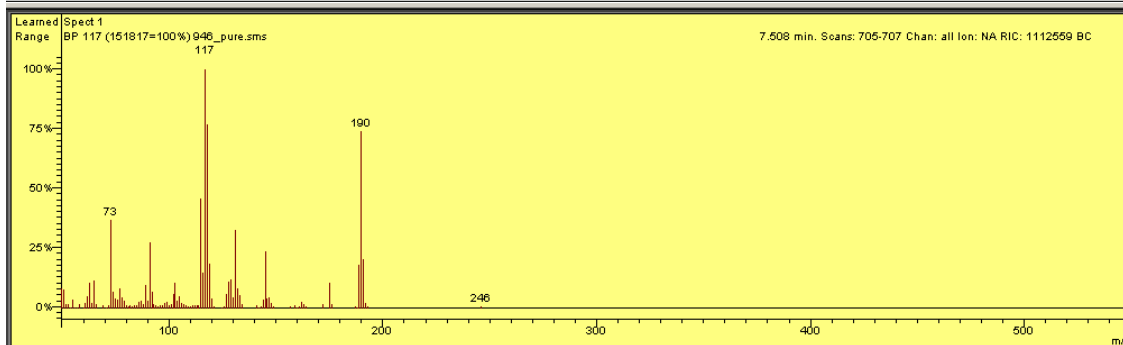

***N*-(1-[4-methylphenyl]ethenyl)-2-azapinone (8)**

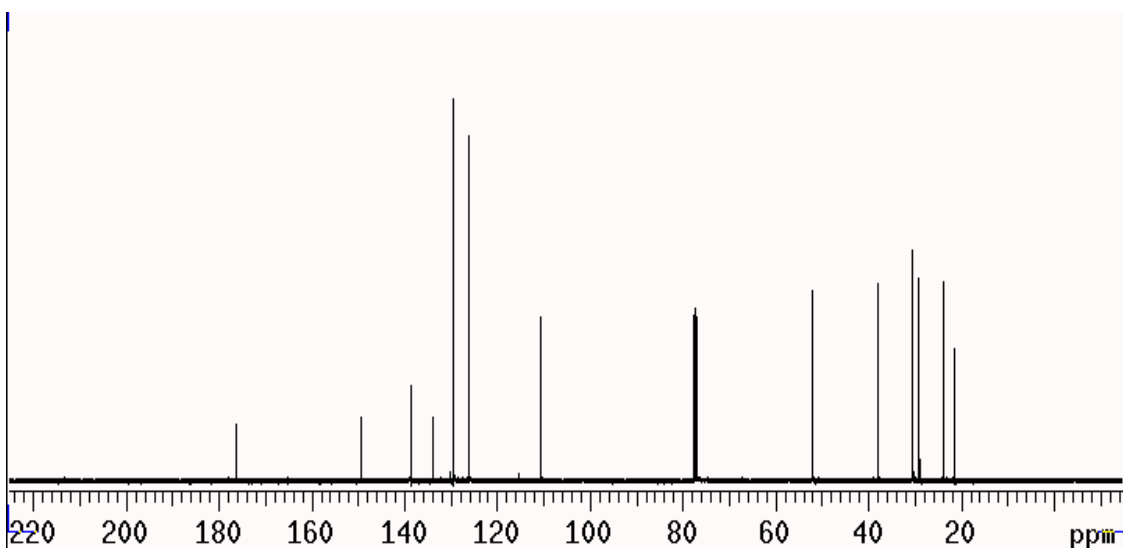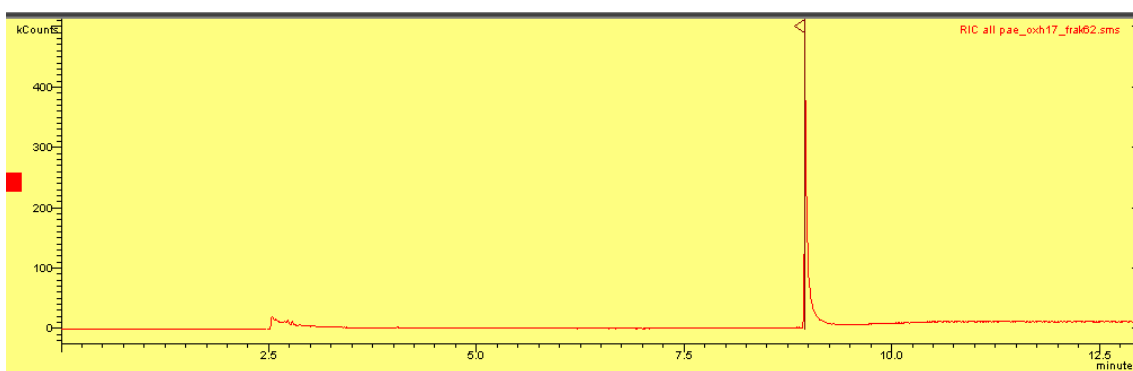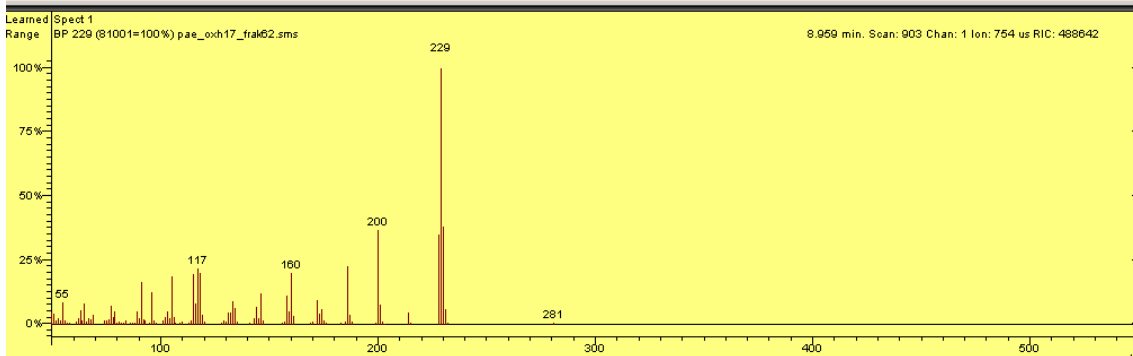

Supplement: b517152k.pdf [file b517152k.pdf]
